# Supplementary material for: Immunoinformatic and systems biology approaches to predict and validate peptide vaccines against Epstein–Barr virus (EBV)
Source: PubMed Central journal article supplement (PMC6346095; doi:10.1038/s41598-018-37070-z), 2019-01-24
Supplement: 41598_2018_37070_MOESM1_ESM.pdf [file 41598_2018_37070_MOESM1_ESM.pdf]

# **Immunoinformatic and systems biology approaches to predict and validate peptide vaccine against Epstein–Barr virus (EBV)**

**Arif Ali\*<sup>1</sup>, Abbas Khan<sup>1</sup>, Aman Chandra Kaushik<sup>1</sup>, Yanjie Wang<sup>1</sup>, Syed Shujait Ali<sup>2</sup>,  
Muhammad Junaid<sup>1</sup>, Shoaib Saleem<sup>2</sup>, William CS Cho<sup>3</sup>, Xueying Mao<sup>4</sup>, Dong-Qing Wei\*<sup>1</sup>**

<sup>1</sup>State Key Laboratory of Microbial Metabolism, and College of Life Sciences and Biotechnology, Shanghai Jiao Tong University, Shanghai, China

<sup>2</sup>Center for Biotechnology and Microbiology, University of Swat, Khyber Pakhtunkhwa, Pakistan

<sup>3</sup>Department of Clinical Oncology, Queen Elizabeth Hospital, Kowloon, Hong Kong

<sup>4</sup>Qianweichang College, Shanghai University, Shanghai China

Dong-Qing Wei\*<sup>1</sup>, (Corresponding Author) [dqwei@sjtu.edu.cn](mailto:dqwei@sjtu.edu.cn)

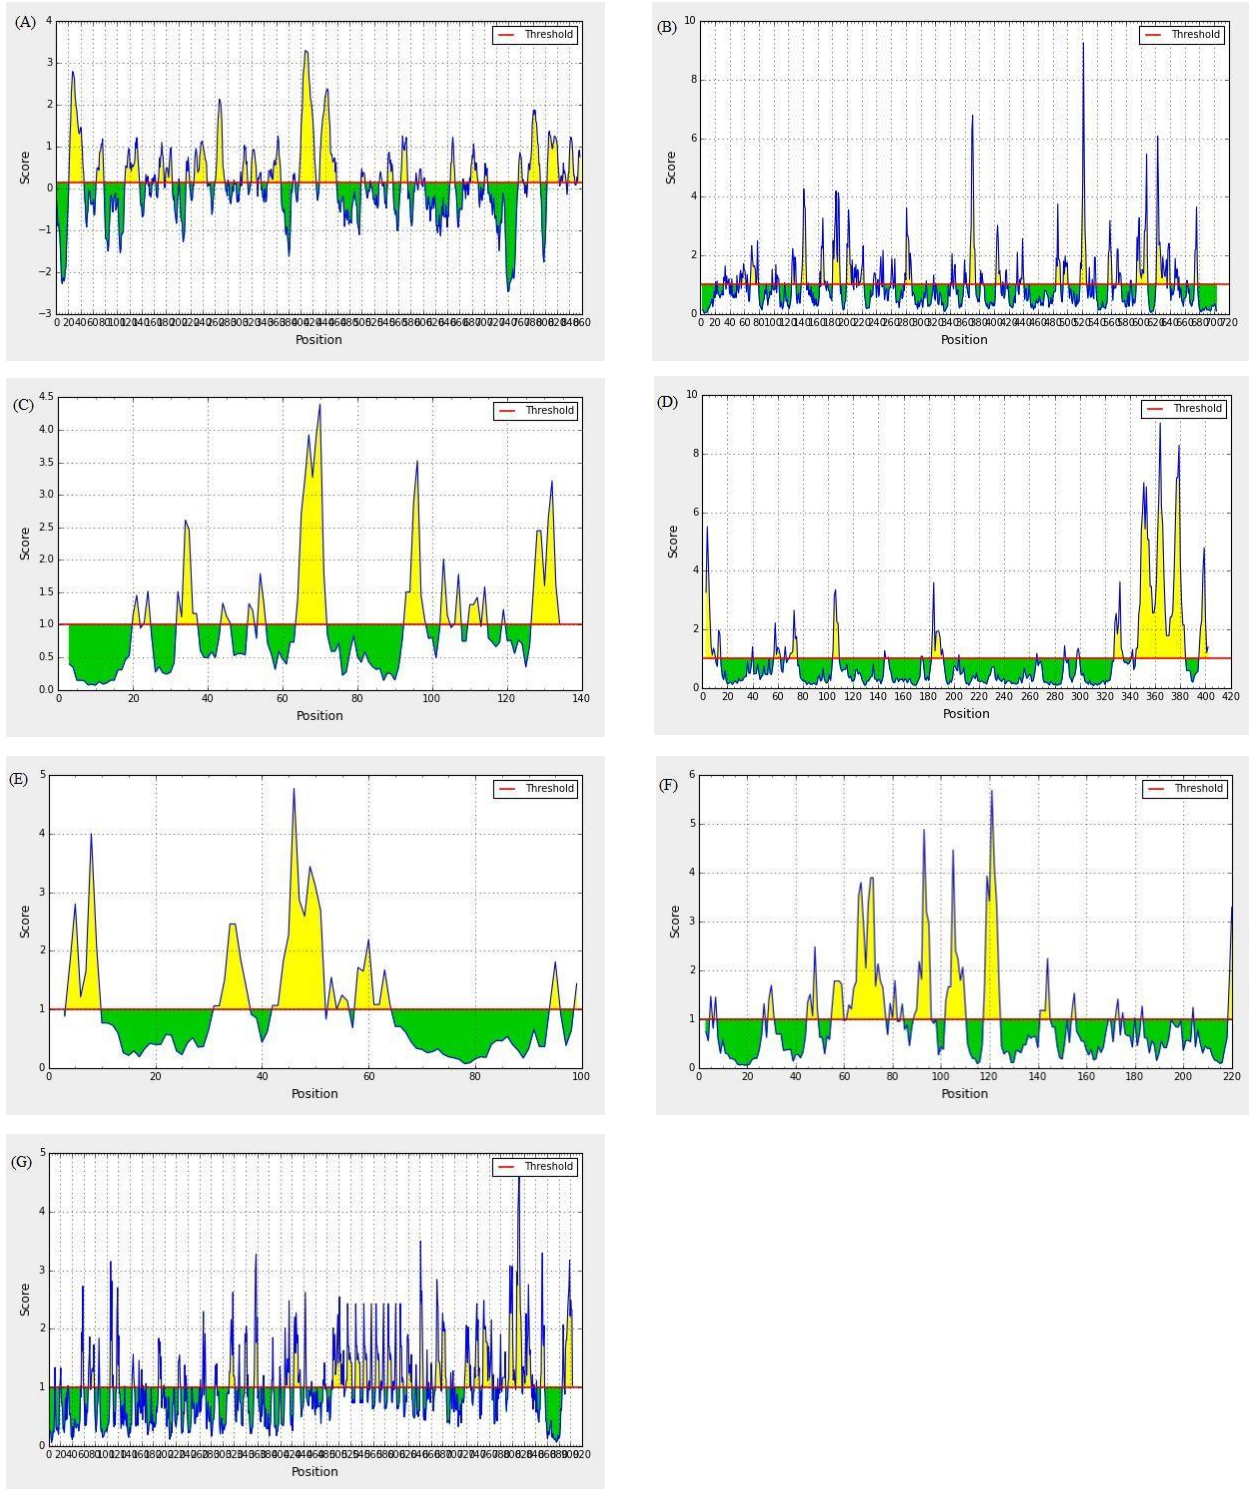

**Figure S1:** Graphical representation of predicted **Surface accessibility** Epstein-Barr Virus.

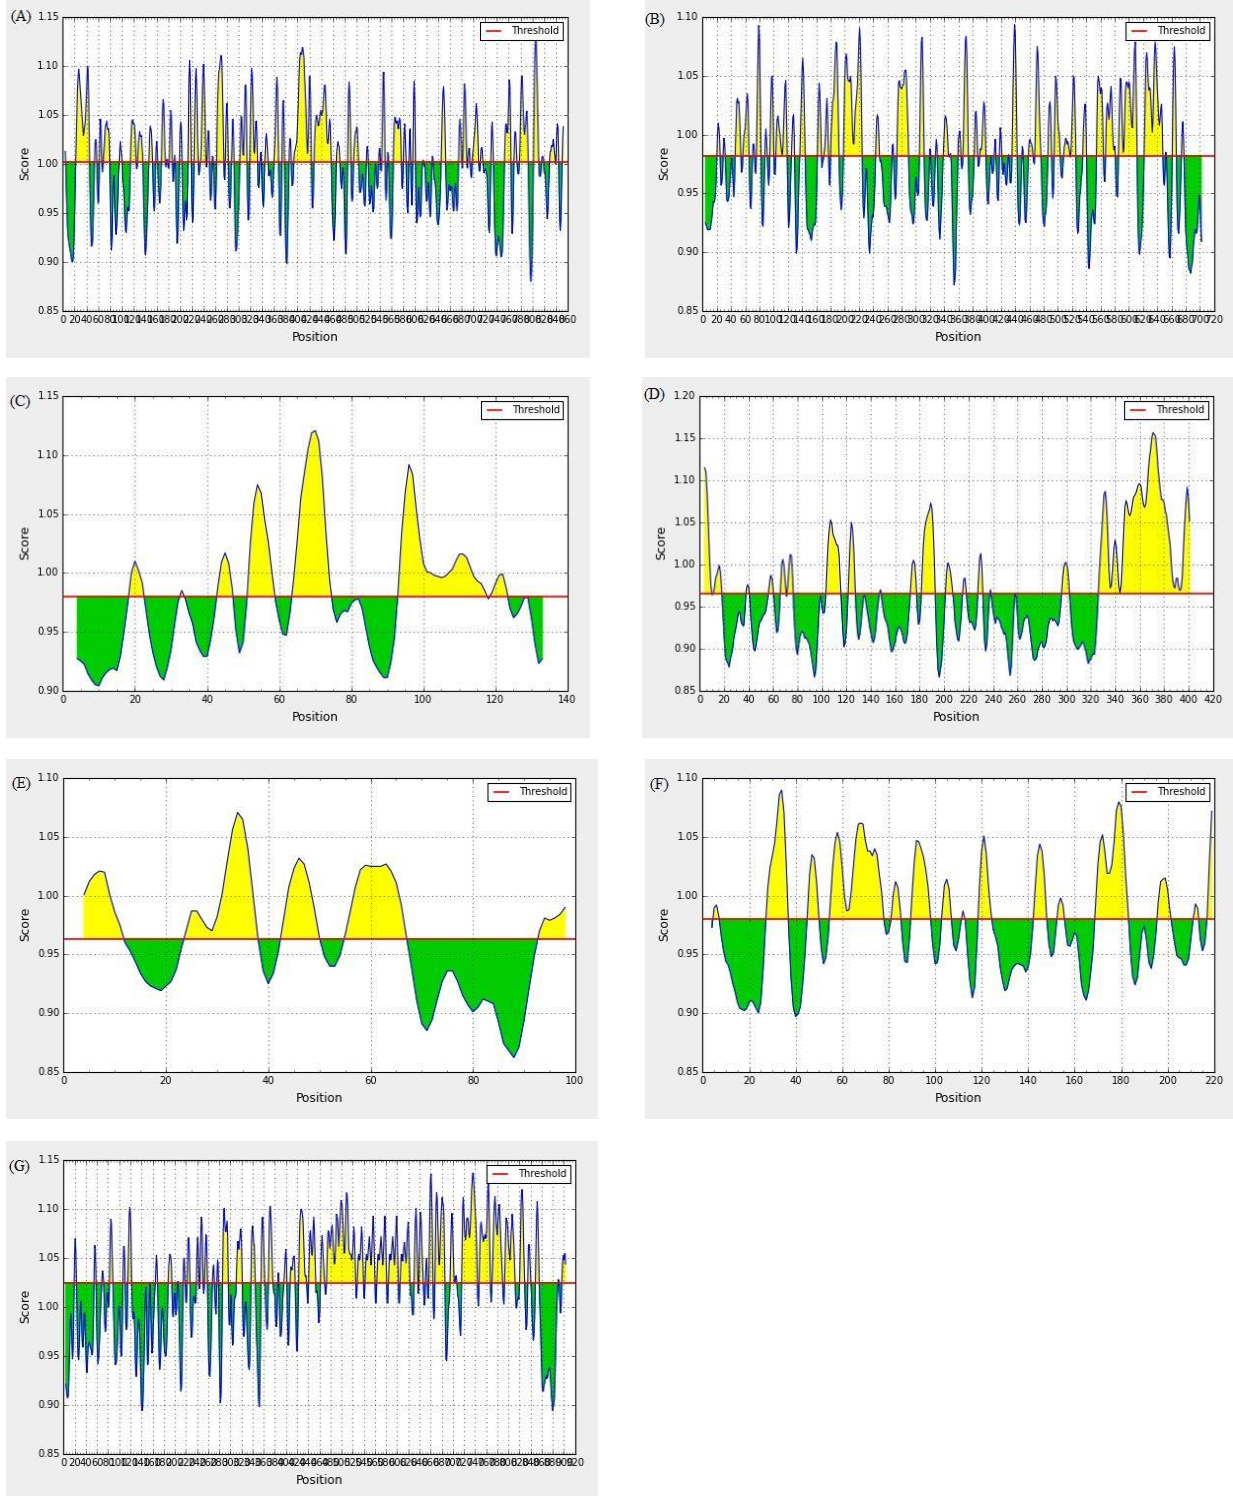

**Figure S2:** Graphical representation of predicted **Surface flexibility** of Epstein-Barr virus.



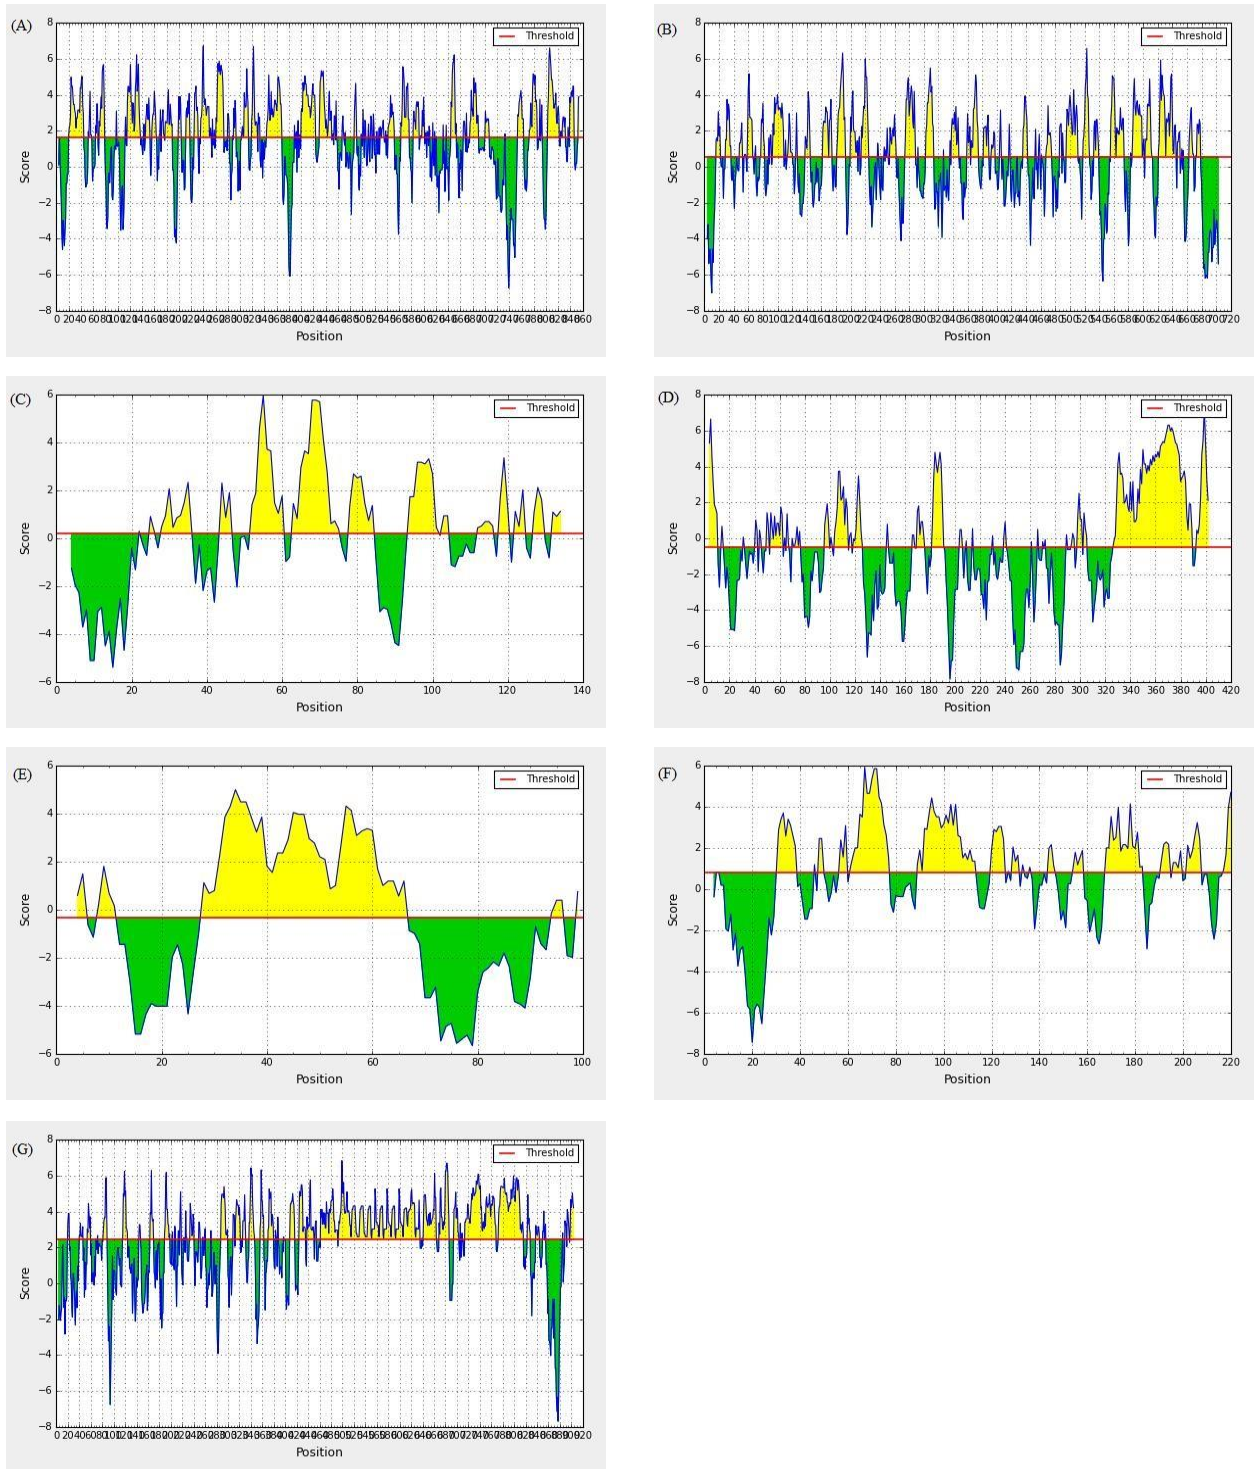

**Figure S3:** Graphical representation of predicted **Parker Hydrophilicity Prediction** for Epstein-Barr virus.

**Table S1:** The table is showing the predicted minimum and maximum Surface Accessibility score of selected proteins.

| Species      | Position | Residue  | Start | End | Peptide | Score |
|--------------|----------|----------|-------|-----|---------|-------|
| <b>GB</b>    | 450      | <b>R</b> | 428   | 433 | RRRRRD  | 9.415 |
|              | 747      | <b>I</b> | 745   | 750 | VVILVI  | 0.032 |
| <b>GH</b>    | 522      | <b>E</b> | 520   | 525 | EREDRD  | 9.265 |
|              | 7        | <b>F</b> | 5     | 10  | CVFCLV  | 0.033 |
| <b>GL</b>    | 70       | <b>G</b> | 68    | 73  | KNGSNQ  | 4.395 |
|              | 10       | <b>I</b> | 8     | 13  | LAICLV  | 0.071 |
| <b>GM</b>    | 364      | <b>R</b> | 362   | 367 | RNRRRS  | 9.054 |
|              | 311      | <b>P</b> | 309   | 314 | IIPILC  | 0.067 |
| <b>GN</b>    | 46       | <b>A</b> | 44    | 49  | TEAQDQ  | 4.777 |
|              | 78       | <b>L</b> | 76    | 81  | LVLVII  | 0.07  |
| <b>GP42</b>  | 121      | <b>K</b> | 119   | 124 | TKKKHT  | 5.691 |
|              | 20       | <b>V</b> | 18    | 23  | VIVLLL  | 0.054 |
| <b>GP350</b> | 812      | <b>P</b> | 810   | 815 | PRPRYN  | 4.859 |
|              | 5        | <b>L</b> | 3     | 8   | AALLVC  | 0.058 |

**Table S2:** The table is showing the predicted minimum and maximum Schulz Flexibility Prediction score of selected proteins.

| Species      | Position | Residue  | Start | End | Peptide | Score |
|--------------|----------|----------|-------|-----|---------|-------|
| <b>GB</b>    | 806      | <b>Q</b> | 803   | 809 | EQNQEQK | 1.13  |
|              | 798      | <b>M</b> | 795   | 801 | QAIMLAL | 0.88  |
| <b>GH</b>    | 439      | <b>Q</b> | 346   | 442 | VITQGPN | 1.094 |
|              | 354      | <b>M</b> | 351   | 357 | LAAMLMA | 0.872 |
| <b>GL</b>    | 70       | <b>G</b> | 67    | 73  | PKNGSNQ | 1.121 |
|              | 10       | <b>I</b> | 7     | 13  | FLAICLV | 0.904 |
| <b>GM</b>    | 371      | <b>S</b> | 368   | 374 | STSSSSS | 1.157 |
|              | 196      | <b>W</b> | 193   | 199 | FLWWVVF | 0.866 |
| <b>GN</b>    | 34       | <b>S</b> | 31    | 37  | GASSPTN | 1.071 |
|              | 88       | <b>M</b> | 85    | 91  | IYLMYVC | 0.862 |
| <b>GP42</b>  | 34       | <b>G</b> | 31    | 37  | VRGGGRV | 1.09  |
|              | 40       | <b>A</b> | 37    | 43  | VAAAAIT | 0.897 |
| <b>GP350</b> | 736      | <b>S</b> | 733   | 739 | PGNSSTS | 1.137 |
|              | 880      | <b>M</b> | 877   | 883 | LLVMADC | 0.894 |

**Table S3:** The table is showing the predicted minimum and maximum Surface Hydrophilicity score of selected proteins.

| <b>Species</b> | <b>Position</b> | <b>Residue</b> | <b>Start</b> | <b>End</b> | <b>Peptide</b> | <b>Score</b> |
|----------------|-----------------|----------------|--------------|------------|----------------|--------------|
| <b>GB</b>      | 240             | <b>N</b>       | 237          | 243        | DGKNKET        | 6.729        |
|                | 739             | <b>L</b>       | 736          | 742        | MLILVLV        | -6.743       |
| <b>GH</b>      | 523             | <b>D</b>       | 520          | 526        | EREDRDA        | 6.586        |
|                | 10              | <b>V</b>       | 7            | 13         | FCLVLLW        | -7.014       |
| <b>GL</b>      | 55              | <b>T</b>       | 52           | 58         | SNQTCDG        | 5.971        |
|                | 15              | <b>I</b>       | 12           | 18         | LVTIFVL        | -5.40        |
| <b>GM</b>      | 399             | <b>S</b>       | 396          | 402        | TIDSEEE        | 7.186        |
|                | 196             | <b>W</b>       | 193          | 199        | FLWWVVF        | -7.857       |
| <b>GN</b>      | 34              | <b>S</b>       | 31           | 37         | GASSPTN        | 5.014        |
|                | 79              | <b>V</b>       | 76           | 82         | LVLVIA         | -5.671       |
| <b>GP42</b>    | 67              | <b>A</b>       | 64           | 70         | NKTEAQE        | 5.943        |
|                | 20              | <b>V</b>       | 17           | 23         | LVIVLLL        | -7.457       |
| <b>GP350</b>   | 499             | <b>T</b>       | 496          | 502        | DNGTESK        | 6.843        |
|                | 877             | <b>L</b>       | 874          | 880        | LLLLLVM        | -7.70        |
